# Supplementary material for: Detection of Avian Haemosporidian Parasites in Wild Birds in Slovakia
Source: MDPI journal article supplement (doi:10.3390/d16020121), 2024-02-13
Supplement: s1 [file s1]

**Table S1.** List of the haemosporidian parasites detected by *cyt b* molecular analysis in the blood samples of the birds from urbanized and natural habitats (us - unusable sequences, dp - double peaks). Numbers in parentheses refer to the number of positive birds of a given lineage (evaluation included only species exceeding 10 individuals). Birds with long-distance migration are marked with the asterisk symbol (\*).

| Haemosporidian species          | Bird species             | Infected/Studied (prevalence) | Haemosporidian Lineage in MALAVI | Haemosporidian Lineage in GenBank |
|---------------------------------|--------------------------|-------------------------------|----------------------------------|-----------------------------------|
| <b>Urbanized habitat</b>        |                          |                               |                                  |                                   |
| <i>H. parabelopolskyi</i>       | <i>Sylvia</i>            | 11/28 (39.29%)                | SYAT02 (7)                       | JN164719                          |
|                                 | <i>atricapilla*</i>      |                               | SYAT10 (1)                       | AY831757                          |
|                                 |                          |                               | SYAT01 (2)                       | AY831750                          |
|                                 |                          |                               | SYAT07 (1)                       | AY831754                          |
| <i>Haemoproteus</i> sp.         | <i>Sylvia</i>            | 1/1                           | CWT4                             | KJ488675                          |
|                                 | <i>communis*</i>         |                               |                                  |                                   |
|                                 | <i>Fringilla coelebs</i> | 4/6                           | CCF2 (3)                         | AF495551                          |
|                                 |                          |                               | CCF1 (1)                         | AF495550                          |
|                                 | <i>Emberiza</i>          | 1/1                           | EMCIR01                          | GU085190                          |
|                                 | <i>citrinella</i>        |                               |                                  |                                   |
|                                 | <i>Sylvia</i>            | 3/28 (10.71%)                 | us (3)                           |                                   |
|                                 | <i>atricapilla*</i>      |                               |                                  |                                   |
|                                 | <i>Turdus merula</i>     | 1/9                           | us                               |                                   |
| Subtotal of <i>Haemoproteus</i> |                          | 21/45 (46.67%)                |                                  |                                   |
| <i>P. relictum</i>              | <i>Parus major</i>       | 5/37 (13.51%)                 | SGS1 (8)                         | MK652232                          |
|                                 | <i>Poecile montanus</i>  | 1/6                           |                                  |                                   |
|                                 | <i>Cyanistes</i>         | 1/9                           |                                  |                                   |
|                                 | <i>caeruleus</i>         |                               |                                  |                                   |
|                                 | <i>Sylvia</i>            | 1/28 (3.52%)                  |                                  |                                   |
|                                 | <i>atricapilla*</i>      |                               |                                  |                                   |
| <i>P. vauhani</i>               | <i>Turdus merula</i>     | 6/9                           | SYAT05 (6)                       | DQ847271                          |
| <i>P. matutinum</i>             | <i>Turdus merula</i>     | 1/9                           | LINN1 (3)                        | DQ847270                          |
|                                 | <i>Erithacus</i>         | 1/10 (10%)                    |                                  |                                   |
|                                 | <i>rubecula</i>          |                               |                                  |                                   |

|                           |                        |                 |                |           |
|---------------------------|------------------------|-----------------|----------------|-----------|
|                           | <i>Emberiza</i>        | 1/15 (6.67%)    |                |           |
|                           | <i>schoeniculus</i>    |                 |                |           |
| <i>P. circumflexum</i>    | <i>Emberiza</i>        | 2/15 (13.33%)   | SYBOR02 (2)    | DQ368392  |
|                           | <i>schoeniculus</i>    |                 |                |           |
|                           | <i>Turdus</i>          | 2/2             | BT7            | MK062195  |
|                           | <i>philomelos</i>      |                 | TURDUS1        | KM361492  |
|                           | <i>Prunella</i>        | 1/6             | TURDUS1        | KM361492  |
|                           | <i>modularis</i>       |                 |                |           |
| Subtotal of               |                        | 22/122 (18.03%) |                |           |
| <i>Plasmodium</i>         |                        |                 |                |           |
| <i>Leucocytozoon</i> sp.  | <i>Parus major</i>     | 12/37 (32.43%)  | PARUS19 (4)    | HM234027  |
|                           |                        |                 | PARUS28 (1)    | JX855047  |
|                           |                        |                 | PARUS4 (4)     | AY393795  |
|                           |                        |                 | PARUS18 (1)    | HM234026  |
|                           |                        |                 | STUR1/TURPEL01 | DQ847246/ |
|                           |                        |                 | (1)            | KT376971  |
|                           |                        |                 | us (1)         |           |
|                           | <i>Cyanistes</i>       | 3/9             | PARUS19        | HM234027  |
|                           | <i>caeruleus</i>       |                 | PARUS4         | AY393795  |
|                           |                        |                 | PARUS50        | JX855065  |
|                           | <i>Turdus merula</i>   | 1/9             | STAL1          | MK652258  |
|                           | <i>Turdus</i>          | 1/2             | dp             |           |
|                           | <i>philomelos</i>      |                 |                |           |
|                           | <i>Sylvia</i>          | 1/28 (3.57%)    | PARUS4         | AY393795  |
|                           | <i>atricapilla*</i>    |                 |                |           |
|                           | <i>Prunella</i>        | 1/6             | PRUMOD01       | KJ488638  |
|                           | <i>modularis</i>       |                 |                |           |
|                           | <b>Natural habitat</b> |                 |                |           |
| <i>H. parabelopolskyi</i> | <i>Sylvia</i>          | 13/32 (40.63%)  | SYAT01 (9)     | JN164718  |
|                           | <i>atricapilla*</i>    |                 | SYAT02 (4)     | JN164719  |
| <i>H. attenuatus</i>      | <i>Erithacus</i>       | 10/42 (23.8%)   | ROBIN1/LULU1   | AY393807  |
|                           | <i>rubecula</i>        |                 |                |           |
|                           | <i>Carduelis</i>       | 1/11 (9.09%)    |                |           |
|                           | <i>carduelis</i>       |                 |                |           |

|                            |                        |                 |          |          |
|----------------------------|------------------------|-----------------|----------|----------|
|                            | <i>Emberiza</i>        | 1/2             |          |          |
|                            | <i>schoeniculus</i>    |                 |          |          |
|                            | <i>Sylvia</i>          | 1/32 (3.13%)    |          |          |
|                            | <i>atricapilla*</i>    |                 |          |          |
|                            | <i>T. philomelos</i>   | 1/1             |          |          |
| <i>H. concavocentralis</i> | <i>Coccothraustes</i>  | 1/3             | HAWF2    | GQ396708 |
|                            | <i>coccothraustes</i>  |                 |          |          |
| <i>H. minutus</i>          | <i>Turdus merula</i>   | 1/4             | TURDUS2  | KM361485 |
| <i>H. pallidus</i>         | <i>Erithacus</i>       | 1/42 (2.38%)    | SYAT03   | JN164720 |
|                            | <i>rubecula</i>        |                 |          |          |
|                            | <i>Carduelis</i>       | 1/11 (9.09%)    |          |          |
|                            | <i>carduelis</i>       |                 |          |          |
| <i>H. noctue</i>           | <i>Erithacus</i>       | 1/42 (2.38%)    | CIRCUM01 | KC994896 |
|                            | <i>rubecula</i>        |                 |          |          |
| <i>H. tartakovskyi</i>     | <i>Coccothraustes</i>  | 1/3             | HAWF1    | DQ368348 |
|                            | <i>coccothraustes</i>  |                 |          |          |
| <i>Haemoproteus</i> sp.    | <i>Erithacus</i>       | 4/42 (9.52%)    | us (4)   |          |
|                            | <i>rubecula</i>        |                 |          |          |
|                            | <i>Carduelis</i>       | 1/11 (9.09%)    | us       |          |
|                            | <i>carduelis</i>       |                 |          |          |
|                            | <i>Emberiza</i>        | 1/4             | CCF6     | DQ368341 |
|                            | <i>citrinella</i>      |                 |          |          |
|                            | <i>Scolopax</i>        | 1/1             | us       |          |
|                            | <i>rusticola*</i>      |                 |          |          |
|                            | <i>Sylvia</i>          | 1/32 (3.13%)    | us       |          |
|                            | <i>atricapilla*</i>    |                 |          |          |
|                            | <i>Sylvia curruca*</i> | 1/4             | LWT1     | AF495563 |
| Subtotal of                |                        | 42/104 (40.38%) |          |          |
| <i>Haemoproteus</i>        |                        |                 |          |          |
| <i>P. circumflexum</i>     | <i>Erithacus</i>       | 2/42 (4.76%)    | TURDUS1  | KM361492 |
|                            | <i>rubecula</i>        |                 |          |          |
|                            | <i>Emberiza</i>        | 1/4             |          |          |
|                            | <i>citrinella</i>      |                 |          |          |

|                          |                          |                |            |          |
|--------------------------|--------------------------|----------------|------------|----------|
| <i>P. relictum</i>       | <i>Emberiza cia</i>      | 1/2            | SGS1       | JX196866 |
|                          | <i>Erithacus</i>         | 1/42 (2.38%)   | dp         |          |
|                          | <i>rubecula</i>          |                |            |          |
|                          | <i>Passer montanus</i>   | 1/2            | SGS1       | MK652232 |
|                          | <i>Fringilla coelebs</i> | 1/3            | COLL1      | AY831747 |
| <i>P. vaughani</i>       | <i>Turdus merula</i>     | 2/4            | SYAT05 (2) | OP546094 |
| <i>P. matutinum</i>      | <i>Turdus merula</i>     | 1/4            | LINN1      | DQ847270 |
| <i>Plasmodium</i> sp.    | <i>Cyanistes</i>         | 1/4            | us         |          |
|                          | <i>caeruleus</i>         |                |            |          |
| Subtotal of              |                          | 11/61 (18.03%) |            |          |
| <i>Plasmodium</i>        |                          |                |            |          |
| <i>Leucocytozoon</i> sp. | <i>Erithacus</i>         | 5/42 (11.9%)   | BT2        | AY393802 |
|                          | <i>rubecula</i>          |                | BT5        | AY393798 |
|                          |                          |                | SFC8       | DQ847234 |
|                          |                          |                | SYCON06    | KP688305 |
|                          |                          |                | PARUS19    | HM234027 |
|                          | <i>Coccothraustes</i>    | 3/3            | us (3)     |          |
|                          | <i>coccothraustes</i>    |                |            |          |
|                          | <i>Scolopax</i>          | 1/1            | SCORUS01   | LC230149 |
|                          | <i>rusticola*</i>        |                |            |          |
|                          | <i>Cyanistes</i>         | 1/4            | PARUS4     | AY393795 |
|                          | <i>caeruleus</i>         |                |            |          |

---

**Table S2.** Parasite intensity in chosen juveniles by qPCR and microscopy

| Bird species              | Microscopy             |                                      | nPCR                          |          |
|---------------------------|------------------------|--------------------------------------|-------------------------------|----------|
|                           | Intensity of infection | Species                              | Intensity of infection (qPCR) | Sequence |
| <i>Turdus merula</i>      | high                   | <i>Plasmodium</i><br><i>vaughani</i> | high                          | SYAT05   |
| <i>Sylvia atricapilla</i> | low                    | <i>Haemoproteus</i> sp.              | low                           | STAL02   |
| <i>Sylvia atricapilla</i> | low                    | <i>Haemoproteus</i> sp.              | low                           | STAL02   |
| <i>Sylvia atricapilla</i> | medium                 | <i>H. parabelopolskyi</i>            | medium                        | STAL02   |
| <i>Erithacus rubecula</i> | high                   | <i>P. matutinum</i>                  | high                          | LINN1    |
| <i>Sylvia atricapilla</i> | medium                 | <i>H. parabelopolskyi</i>            | medium                        | SYAT02   |
| <i>Sylvia atricapilla</i> | low                    | <i>H. parabelopolskyi</i>            | medium                        | dp       |
| <i>Sylvia atricapilla</i> | low                    | <i>H. parabelopolskyi</i>            | low                           | SYAT01   |
